# Supplementary material for: Influence of Oak Wood Seasoning Duration and Toasting Degree on Endogenous and Wood-Derived Compounds of Brandy Italiano
Source: Springer Nature journal article supplement (doi:10.1007/s11947-025-04115-x), 2025-12-09
Supplement: MOESM1 [file 11947_2025_4115_MOESM1_ESM.pdf]

## SUPPLEMENTARY MATERIAL

Food and Bioprocess Technology

### **Influence of Oak Wood Seasoning Duration and Toasting Degree on Endogenous and Wood-Derived Compounds of *Brandy Italiano***

Silvia Arduini <sup>1,\*</sup> (<https://orcid.org/0009-0001-8457-1593>) and Fabio Chinnici <sup>1,2,\*</sup> (<https://orcid.org/0000-0003-3874-0680>)

<sup>1</sup> Department of Agricultural and Food Sciences, University of Bologna, Viale Fanin 40, 40127 Bologna, Italy

<sup>2</sup> Interdepartmental Center for Agri-Food Industrial Research (Ciri-Agro), Via Quinto Bucci 336, 47521 Cesena, Italy

\* Correspondence: [silvia.arduini2@unibo.it](mailto:silvia.arduini2@unibo.it); [fabio.chinnici@unibo.it](mailto:fabio.chinnici@unibo.it);

**Table S1** Volatile compounds identified in brandy samples by SPE-GC-MS

| Compound | Name                               | LRI <sup>a</sup> | Identification <sup>b</sup> | Standard supplier <sup>c</sup> |
|----------|------------------------------------|------------------|-----------------------------|--------------------------------|
| 1        | 1-Propanol                         | 1041             | MS, LRI                     |                                |
| 2        | Ethyl butyrate                     | 1046             | S, MS, LRI                  | Carlo Erba                     |
| 3        | Ethyl 2-methylbutyrate             | 1057             | MS, LRI                     |                                |
| 4        | Ethyl isovalerate                  | 1068             | MS, LRI                     |                                |
| 5        | Isobutanol                         | 1076             | S, MS, LRI                  | Sigma-Aldrich                  |
| 6        | Isoamyl acetate                    | 1110             | S, MS, LRI                  | Sigma-Aldrich                  |
| 7        | Isocineole                         | 1170             | MS, LRI                     |                                |
| 8        | 2-Heptanone                        | 1179             | MS, LRI                     |                                |
| 9        | Isoamyl alcohol                    | 1205             | S, MS, LRI                  | Carlo Erba                     |
| 10       | Ethyl hexanoate                    | 1231             | S, MS, LRI                  | Sigma-Aldrich                  |
| 11       | Hexyl acetate                      | 1270             | MS, LRI                     |                                |
| 12       | 2-Hexanol                          | 1305             | S, MS, LRI                  | Sigma-Aldrich                  |
| 13       | 1-Pentanol-4-methyl                | 1310             | MS, LRI                     |                                |
| 14       | 1-Pentanol-3-methyl                | 1324             | S, MS, LRI                  | Sigma-Aldrich                  |
| 15       | Ethyl heptanoate                   | 1335             | MS, LRI                     |                                |
| 16       | Ethyl lactate                      | 1343             | MS, LRI                     |                                |
| 17       | Ethyl 2-hexenoate                  | 1347             | MS, LRI                     |                                |
| 18       | 1-Hexanol                          | 1353             | S, MS, LRI                  | Fluka                          |
| 19       | Cis-3-hexen-1-ol                   | 1387             | MS, LRI                     |                                |
| 20       | 2-Nonanone                         | 1394             | MS, LRI                     |                                |
| 21       | Methyl n-octanoate                 | 1395             | MS, LRI                     |                                |
| 22       | Trans-2-hexen-1-ol                 | 1418             | MS, LRI                     |                                |
| 23       | Ethyl 2-hydroxyisovalerate         | 1426             | MS, LRI                     |                                |
| 24       | Ethyl octanoate                    | 1437             | S, MS, LRI                  | Sigma-Aldrich                  |
| 25       | Linalool oxide                     | 1438             | S, MS, LRI                  | Sigma-Aldrich                  |
| 26       | 1-Octene-3-ol                      | 1448             | MS, LRI                     |                                |
| 27       | 1-Heptanol                         | 1452             | S, MS, LRI                  | Sigma-Aldrich                  |
| 28       | Acetic acid                        | 1456             | S, MS, LRI                  | Sigma-Aldrich                  |
| 29       | 2-Furaldehyde diethyl acetal       | 1460             | MS, LRI                     |                                |
| 30       | 2-Ethyl-1-hexanol                  | 1484             | MS, LRI                     |                                |
| 31       | 3-Ethyl-4-methylpentan-1-ol        | 1500             | MS, LRI                     |                                |
| 32       | 2-Nonanol                          | 1515             | MS, LRI                     |                                |
| 33       | Vitispirane                        | 1518             | MS, LRI                     |                                |
| 34       | Benzaldehyde                       | 1521             | MS, LRI                     |                                |
| 35       | Ethyl nonanoate                    | 1535             | S, MS, LRI                  | Sigma-Aldrich                  |
| 36       | Ethyl 2-hydroxy-4-methylpentanoate | 1543             | MS, LRI                     |                                |
| 37       | L-Linalool                         | 1548             | MS, LRI                     |                                |
| 38       | Iso-butyl n-octanoate              | 1553             | MS, LRI                     |                                |
| 39       | 1-Octanol                          | 1559             | S, MS, LRI                  | Sigma-Aldrich                  |
| 40       | Isoamyl lactate                    | 1572             | S, MS, LRI                  | ICN Biomed                     |
| 41       | 1-Terpinenol                       | 1576             | MS, LRI                     |                                |
| 42       | Methyl decanoate                   | 1600             | MS, LRI                     |                                |
| 43       | Terpinen-4-ol                      | 1605             | MS, LRI                     |                                |
| 44       | Hotrienol                          | 1620             | MS, LRI                     |                                |
| 45       | Myrcenol                           | 1622             | MS, LRI                     |                                |
| 46       | Ethyl furoate                      | 1629             | MS, LRI                     |                                |
| 47       | Ethyl decanoate                    | 1660             | MS, LRI                     |                                |
| 48       | (E)-Ocimenyl acetate               | 1676             | MS, LRI                     |                                |
| 49       | Isoamyl octanoate                  | 1680             | MS, LRI                     |                                |
| 50       | Pentanoic acid                     | 1697             | MS, LRI                     |                                |
| 51       | Diethyl succinate                  | 1704             | MS, LRI                     |                                |
| 52       | Ethyl 9-decenoate                  | 1714             | MS, LRI                     |                                |
| 53       | $\alpha$ -Terpineol                | 1718             | S, MS, LRI                  | Sigma-Aldrich                  |
| 54       | 1-Decanol                          | 1770             | MS, LRI                     |                                |
| 55       | B-Citronellol                      | 1773             | S, MS, LRI                  | Fluka                          |
| 56       | Methyl salicylate                  | 1782             | MS, LRI                     |                                |
| 57       | Ethyl phenylacetate                | 1789             | MS, LRI                     |                                |
| 58       | Succinic acid, butyl ethyl ester   | 1795             | MS, LRI                     |                                |
| 59       | 2-Phenylethyl acetate              | 1823             | MS, LRI                     |                                |
| 60       | $\beta$ -Damascenone               | 1828             | S, MS, LRI                  | L'Italiana Aromi               |

|    |                                               |      |                      |               |
|----|-----------------------------------------------|------|----------------------|---------------|
| 61 | Ethyl dodecanoate                             | 1866 | S, MS, LRI           | Sigma-Aldrich |
| 62 | Hexanoic acid                                 | 1869 | S, MS, LRI           | Fluka         |
| 63 | Isoamyl n-decanoate                           | 1892 | MS, LRI              |               |
| 64 | Benzyl alcohol                                | 1908 | MS, LRI              |               |
| 65 | trans- $\beta$ -Methyl- $\gamma$ -Octalactone | 1917 | S, MS, LRI           | Sigma-Aldrich |
| 66 | Ethyl isopentyl succinate                     | 1927 | MS, LRI              |               |
| 67 | Phenethyl alcohol                             | 1934 | MS, LRI              |               |
| 68 | cis- $\beta$ -methyl- $\gamma$ -octalactone   | 1970 | S, MS, LRI           | Sigma-Aldrich |
| 69 | 4-Ethylguaiaicol                              | 2030 | MS, LRI              |               |
| 70 | Nerolidol                                     | 2038 | MS, LRI              |               |
| 71 | Ethyl tetradecanoate                          | 2048 | S, MS, LRI           | Sigma-Aldrich |
| 72 | N-octanoic acid                               | 2059 | MS, LRI              |               |
| 73 | N-nonanoic acid                               | 2184 | MS, LRI              |               |
| 74 | Eugenol                                       | 2190 | S, MS, LRI           | Fluka         |
| 75 | Ethyl hexadecanoate                           | 2269 | S, MS, LRI           | Sigma-Aldrich |
| 76 | 2,3-Dihydrofarnesol                           | 2278 | MS, LRI              |               |
| 77 | N-decanoic acid                               | 2284 | S, MS, LRI           | Sigma-Aldrich |
| 78 | 9-Decenoic acid                               | 2327 | MS, LRI              |               |
| 79 | Farnesol                                      | 2341 | S, MS, LRI           | Sigma-Aldrich |
| 80 | 1-Hexadecanol                                 | 2356 | MS, LRI              |               |
| 81 | Phenylethyl octanoate                         | 2362 | MS, LRI              |               |
| 82 | Dodecanoic acid                               | 2442 | S, MS, LRI           | Sigma-Aldrich |
| 83 | 9,12-Octadecadienoic acid, ethyl ester        | 2491 | MS, LRI              |               |
| 84 | Ethyl 9,12,15-octadecatrienoate               | 2581 | MS, LRI              |               |
| 85 | Ethyl vanillate                               | 2628 | S, MS, LRI           | Sigma-Aldrich |
| 86 | Acetovanillone                                | 2637 | S, MS, LRI           | Sigma-Aldrich |
| 87 | Vanillyl methyl ketone                        | 2653 | MS, LRI <sup>1</sup> |               |
| 88 | Tetradecanoic acid                            | 2680 | MS, LRI              |               |
| 89 | Propiovanillone                               | 2698 | MS, LRI              |               |
| 90 | Methoxyeugenol                                | 2714 | MS, LRI              |               |
| 91 | Pentadecanoic acid                            | 2746 | MS, LRI              |               |
| 92 | Palmitic acid                                 | 2809 | MS, LRI <sup>2</sup> |               |
| 93 | Stearic acid                                  | 3056 | MS, LRI              |               |
| 94 | Linoleic acid                                 | 3193 | MS, LRI              |               |

<sup>a</sup> Linear Retention Index values calculated by comparison of the retention times of the analytes with a homologous series of normal alkanes (C10–C32) analysed with the same GC method.

<sup>b</sup> Method of identification: S, by comparing mass spectra and retention times with those of standard compounds; MS, by comparing mass spectra with those reported in NIST 2.0 and Wiley 7 libraries; LRI, by comparing linear retention indexes with those included in (U.S. Secretary of Commerce on behalf of the United States of America, 2023) or with those reported in the following references: <sup>1</sup>(Fernández De Simón et al., 2014), <sup>2</sup>(Natali et al., 2006).

<sup>c</sup> List of standard suppliers for analytes identified by comparison with standard compounds.

**Table S2** Mean content ( $\mu\text{g/L}$  2-octanol  $\pm SD$ ) of endogenous volatiles determined by SPE-GC-MS and analysed by two-way ANOVA at  $t_0$  and after 8 months of aging as a function of wood toasting level (T): H = heavy, L = light, seasoning duration (S): 24 and 36 months and their interaction (TxS). Asterisks (\*) indicate statistically significant effects ( $p < 0.05$ ).

| Chemical class              | Compound                     |                               |                               |                               |                               |                               | Effects |   |     |
|-----------------------------|------------------------------|-------------------------------|-------------------------------|-------------------------------|-------------------------------|-------------------------------|---------|---|-----|
|                             |                              | C ( $t_0$ )                   | H36                           | H24                           | L36                           | L24                           | T       | S | TxS |
| Acetate Esters              |                              |                               |                               |                               |                               |                               |         |   |     |
|                             | isoamyl acetate              | 1258 $\pm$ 3 <sup>a</sup>     | 1091 $\pm$ 7 <sup>c</sup>     | 1031 $\pm$ 12 <sup>d</sup>    | 1230 $\pm$ 5 <sup>a</sup>     | 1161 $\pm$ 7 <sup>b</sup>     | *       | * |     |
|                             | hexyl acetate                | 37 $\pm$ 1 <sup>a</sup>       | 32 $\pm$ 3 <sup>ab</sup>      | 28 $\pm$ 2 <sup>b</sup>       | 35 $\pm$ 1 <sup>a</sup>       | 31 $\pm$ 1 <sup>ab</sup>      |         | * |     |
|                             | (E)-ocimanyl acetate         | 87 $\pm$ 4 <sup>a</sup>       | 78 $\pm$ 2 <sup>b</sup>       | 82 $\pm$ 4 <sup>ab</sup>      | 77 $\pm$ 1 <sup>b</sup>       | 84 $\pm$ 2 <sup>ab</sup>      |         | * |     |
|                             | ethyl phenylacetate          | 19 $\pm$ 0 <sup>c</sup>       | 27 $\pm$ 4 <sup>a</sup>       | 24 $\pm$ 5 <sup>b</sup>       | 29 $\pm$ 2 <sup>a</sup>       | 24 $\pm$ 1 <sup>bc</sup>      |         | * |     |
|                             | 2-phenylethyl acetate        | 221 $\pm$ 8 <sup>a</sup>      | 173 $\pm$ 4 <sup>c</sup>      | 172 $\pm$ 5 <sup>c</sup>      | 183 $\pm$ 3 <sup>bc</sup>     | 196 $\pm$ 3 <sup>b</sup>      | *       | * | *   |
|                             | Sum                          | 1623 $\pm$ 10 <sup>a</sup>    | 1401 $\pm$ 5 <sup>d</sup>     | 1337 $\pm$ 6 <sup>e</sup>     | 1555 $\pm$ 10 <sup>b</sup>    | 1495 $\pm$ 8 <sup>c</sup>     | *       | * |     |
| Acids                       |                              |                               |                               |                               |                               |                               |         |   |     |
|                             | acetic acid                  | 23 $\pm$ 2 <sup>c</sup>       | 137 $\pm$ 11 <sup>ab</sup>    | 182 $\pm$ 29 <sup>a</sup>     | 135 $\pm$ 3 <sup>ab</sup>     | 100 $\pm$ 1 <sup>b</sup>      | *       |   | *   |
|                             | pentanoic acid               | 26 $\pm$ 2 <sup>c</sup>       | 35 $\pm$ 1 <sup>b</sup>       | 33 $\pm$ 1 <sup>b</sup>       | 43 $\pm$ 1 <sup>a</sup>       | 42 $\pm$ 1 <sup>a</sup>       | *       | * |     |
|                             | hexanoic acid                | 168 $\pm$ 10 <sup>b</sup>     | 183 $\pm$ 16 <sup>b</sup>     | 188 $\pm$ 7 <sup>b</sup>      | 246 $\pm$ 7 <sup>a</sup>      | 271 $\pm$ 10 <sup>a</sup>     | *       |   | *   |
|                             | n-octanoic acid              | 7102 $\pm$ 408 <sup>b</sup>   | 7246 $\pm$ 123 <sup>b</sup>   | 7880 $\pm$ 139 <sup>a</sup>   | 7162 $\pm$ 239 <sup>b</sup>   | 6807 $\pm$ 145 <sup>b</sup>   | *       |   | *   |
|                             | n-nonanoic acid              | 33 $\pm$ 0 <sup>a</sup>       | 23 $\pm$ 3 <sup>c</sup>       | 33 $\pm$ 3 <sup>a</sup>       | 25 $\pm$ 1 <sup>bc</sup>      | 32 $\pm$ 1 <sup>ab</sup>      |         | * |     |
|                             | n-decanoic acid              | 5918 $\pm$ 23 <sup>a</sup>    | 5936 $\pm$ 190 <sup>a</sup>   | 6751 $\pm$ 519 <sup>a</sup>   | 5919 $\pm$ 360 <sup>a</sup>   | 5795 $\pm$ 200 <sup>a</sup>   | *       |   |     |
|                             | 9-decenoic acid              | 13 $\pm$ 0 <sup>c</sup>       | 17 $\pm$ 2 <sup>ab</sup>      | 19 $\pm$ 1 <sup>a</sup>       | 12 $\pm$ 1 <sup>c</sup>       | 14 $\pm$ 1 <sup>bc</sup>      |         |   |     |
|                             | dodecanoic acid              | 1480 $\pm$ 135 <sup>b</sup>   | 1827 $\pm$ 172 <sup>ab</sup>  | 2123 $\pm$ 241 <sup>a</sup>   | 1435 $\pm$ 131 <sup>b</sup>   | 1821 $\pm$ 149 <sup>ab</sup>  | *       | * |     |
|                             | tetradecanoic acid           | 213 $\pm$ 23 <sup>a</sup>     | 257 $\pm$ 15 <sup>b</sup>     | 325 $\pm$ 42 <sup>a</sup>     | 236 $\pm$ 10 <sup>b</sup>     | 281 $\pm$ 13 <sup>ab</sup>    |         | * |     |
|                             | pentadecanoic acid           | 44 $\pm$ 9 <sup>ab</sup>      | 37 $\pm$ 3 <sup>ab</sup>      | 48 $\pm$ 6 <sup>a</sup>       | 32 $\pm$ 3 <sup>b</sup>       | 45 $\pm$ 5 <sup>ab</sup>      |         | * |     |
|                             | palmitic acid                | 626 $\pm$ 4 <sup>c</sup>      | 954 $\pm$ 85 <sup>b</sup>     | 1206 $\pm$ 78 <sup>a</sup>    | 824 $\pm$ 52 <sup>bc</sup>    | 1048 $\pm$ 110 <sup>ab</sup>  | *       | * |     |
|                             | stearic acid                 | 121 $\pm$ 10 <sup>b</sup>     | 150 $\pm$ 22 <sup>b</sup>     | 294 $\pm$ 15 <sup>a</sup>     | 276 $\pm$ 34 <sup>a</sup>     | 264 $\pm$ 51 <sup>a</sup>     | *       | * | *   |
|                             | linoleic acid                | 98 $\pm$ 12 <sup>b</sup>      | 550 $\pm$ 21 <sup>a</sup>     | 826 $\pm$ 200 <sup>a</sup>    | 96 $\pm$ 6 <sup>b</sup>       | 508 $\pm$ 49 <sup>a</sup>     | *       | * |     |
| Sum                         | 15863 $\pm$ 239 <sup>b</sup> | 17352 $\pm$ 528 <sup>b</sup>  | 19907 $\pm$ 1214 <sup>a</sup> | 16440 $\pm$ 793 <sup>b</sup>  | 17028 $\pm$ 623 <sup>b</sup>  | *                             | *       |   |     |
| Alcohols                    |                              |                               |                               |                               |                               |                               |         |   |     |
|                             | 1-propanol                   | 4 $\pm$ 0 <sup>a</sup>        | 4 $\pm$ 0 <sup>a</sup>        | 5 $\pm$ 1 <sup>a</sup>        | 4 $\pm$ 0 <sup>a</sup>        | 6 $\pm$ 0 <sup>a</sup>        |         | * |     |
|                             | isobutanol                   | 1260 $\pm$ 84 <sup>b</sup>    | 1009 $\pm$ 43 <sup>c</sup>    | 1210 $\pm$ 101 <sup>b</sup>   | 1357 $\pm$ 15 <sup>ab</sup>   | 1561 $\pm$ 43 <sup>a</sup>    | *       | * |     |
|                             | isoamyl alcohol              | 18443 $\pm$ 1446 <sup>a</sup> | 16485 $\pm$ 301 <sup>b</sup>  | 16872 $\pm$ 437 <sup>ab</sup> | 18047 $\pm$ 176 <sup>ab</sup> | 17464 $\pm$ 185 <sup>ab</sup> | *       |   | *   |
|                             | 2-hexanol                    | 24 $\pm$ 2 <sup>a</sup>       | 14 $\pm$ 12 <sup>a</sup>      | 13 $\pm$ 12 <sup>a</sup>      | 32 $\pm$ 1 <sup>a</sup>       | 26 $\pm$ 0 <sup>a</sup>       | *       |   |     |
|                             | 1-Pentanol-4-methyl          | 8 $\pm$ 0 <sup>a</sup>        | 6 $\pm$ 0 <sup>b</sup>        | 6 $\pm$ 0 <sup>b</sup>        | 7 $\pm$ 0 <sup>b</sup>        | 9 $\pm$ 0 <sup>a</sup>        | *       | * | *   |
|                             | 1-pentanol-3-methyl          | 48 $\pm$ 3 <sup>a</sup>       | 38 $\pm$ 1 <sup>b</sup>       | 35 $\pm$ 4 <sup>b</sup>       | 39 $\pm$ 3 <sup>b</sup>       | 50 $\pm$ 1 <sup>a</sup>       | *       | * | *   |
|                             | 1-hexanol                    | 1643 $\pm$ 22 <sup>a</sup>    | 1216 $\pm$ 32 <sup>c</sup>    | 1221 $\pm$ 26 <sup>c</sup>    | 1447 $\pm$ 4 <sup>b</sup>     | 1674 $\pm$ 9 <sup>a</sup>     | *       | * | *   |
|                             | cis-3-hexen-1-ol             | 94 $\pm$ 7 <sup>a</sup>       | 70 $\pm$ 3 <sup>b</sup>       | 68 $\pm$ 3 <sup>b</sup>       | 75 $\pm$ 0 <sup>b</sup>       | 94 $\pm$ 1 <sup>a</sup>       | *       | * | *   |
|                             | trans-2-hexen-1-ol           | 4 $\pm$ 0 <sup>ab</sup>       | 3 $\pm$ 0 <sup>d</sup>        | 3 $\pm$ 0 <sup>bc</sup>       | 3 $\pm$ 0 <sup>cd</sup>       | 4 $\pm$ 0 <sup>a</sup>        | *       | * |     |
|                             | 1-octene-3-ol                | 6 $\pm$ 1 <sup>c</sup>        | 11 $\pm$ 1 <sup>a</sup>       | 8 $\pm$ 0 <sup>bc</sup>       | 8 $\pm$ 1 <sup>bc</sup>       | 11 $\pm$ 0 <sup>ab</sup>      |         |   | *   |
|                             | 1-heptanol                   | 36 $\pm$ 3 <sup>ab</sup>      | 38 $\pm$ 1 <sup>ab</sup>      | 38 $\pm$ 1 <sup>ab</sup>      | 42 $\pm$ 3 <sup>a</sup>       | 34 $\pm$ 0 <sup>b</sup>       |         | * | *   |
|                             | 2-ethyl-1-hexanol            | 72 $\pm$ 3 <sup>c</sup>       | 84 $\pm$ 5 <sup>b</sup>       | 86 $\pm$ 2 <sup>b</sup>       | 109 $\pm$ 2 <sup>a</sup>      | 90 $\pm$ 1 <sup>b</sup>       | *       | * | *   |
| 3-ethyl-4-methylpentan-1-ol | 38 $\pm$ 1 <sup>b</sup>      | 57 $\pm$ 2 <sup>a</sup>       | 59 $\pm$ 8 <sup>a</sup>       | 45 $\pm$ 0 <sup>ab</sup>      | 50 $\pm$ 1 <sup>ab</sup>      | *                             |         |   |     |

| Chemical class                   | Compound                           |                          |                         |                         |                         |                         | Effects |   |     |
|----------------------------------|------------------------------------|--------------------------|-------------------------|-------------------------|-------------------------|-------------------------|---------|---|-----|
|                                  |                                    | C (t <sub>0</sub> )      | H36                     | H24                     | L36                     | L24                     | T       | S | TxS |
|                                  | 2-nonanol                          | 14 ±0 <sup>b</sup>       | 18 ±2 <sup>b</sup>      | 14 ±1 <sup>b</sup>      | 33 ±6 <sup>a</sup>      | 15 ±0 <sup>b</sup>      | *       | * | *   |
|                                  | 1-octanol                          | 127 ±5 <sup>ab</sup>     | 123 ±2 <sup>b</sup>     | 122 ±6 <sup>b</sup>     | 141 ±8 <sup>a</sup>     | 125 ±3 <sup>ab</sup>    | *       | * | *   |
|                                  | 1-decanol                          | 63 ±3 <sup>ab</sup>      | 61 ±2 <sup>b</sup>      | 67 ±5 <sup>ab</sup>     | 76 ±7 <sup>a</sup>      | 63 ±2 <sup>ab</sup>     |         |   | *   |
|                                  | benzyl alcohol                     | 1 ±0 <sup>ab</sup>       | 1 ±0 <sup>b</sup>       | 1 ±0 <sup>b</sup>       | 1 ±0 <sup>ab</sup>      | 1 ±0 <sup>a</sup>       | *       | * |     |
|                                  | phenethyl alcohol                  | 2633 ±53 <sup>a</sup>    | 2092 ±95 <sup>c</sup>   | 2170 ±66 <sup>bc</sup>  | 2331 ±30 <sup>b</sup>   | 2614 ±21 <sup>a</sup>   | *       | * |     |
|                                  | 1-hexadecanol                      | 73 ±10 <sup>ab</sup>     | 69 ±7 <sup>b</sup>      | 85 ±3 <sup>a</sup>      | 55 ±9 <sup>b</sup>      | 70 ±2 <sup>ab</sup>     | *       | * |     |
|                                  | Sum                                | 24593 ±1364 <sup>a</sup> | 21397 ±254 <sup>b</sup> | 22084 ±607 <sup>b</sup> | 23850 ±180 <sup>a</sup> | 23959 ±190 <sup>a</sup> | *       |   |     |
| Aldehydes                        |                                    |                          |                         |                         |                         |                         |         |   |     |
|                                  | benzaldehyde                       | 260 ±2 <sup>ab</sup>     | 241 ±11 <sup>bc</sup>   | 232 ±2 <sup>c</sup>     | 249 ±8 <sup>bc</sup>    | 273±1 <sup>a</sup>      | *       |   | *   |
| Esters                           |                                    |                          |                         |                         |                         |                         |         |   |     |
|                                  | methyl n-octanoate                 | 3 ±0 <sup>b</sup>        | 3 ±0 <sup>b</sup>       | 3 ±0 <sup>b</sup>       | 4 ±0 <sup>a</sup>       | 3±0 <sup>b</sup>        | *       | * | *   |
|                                  | iso-butyl n-octanoate              | 11 ±0 <sup>b</sup>       | 13 ±1 <sup>b</sup>      | 11 ±2 <sup>b</sup>      | 24 ±1 <sup>a</sup>      | 9 ±0 <sup>b</sup>       | *       | * | *   |
|                                  | isoamyl lactate                    | 442 ±9 <sup>a</sup>      | 224 ±10 <sup>e</sup>    | 250 ±6 <sup>d</sup>     | 310 ±2 <sup>c</sup>     | 394 ±8 <sup>b</sup>     | *       | * | *   |
|                                  | methyl decanoate                   | 11 ±1 <sup>ab</sup>      | 14 ±1 <sup>a</sup>      | 12 ±2 <sup>ab</sup>     | 14 ±1 <sup>a</sup>      | 9±0 <sup>b</sup>        |         | * |     |
|                                  | isoamyl octanoate                  | 90 ±6 <sup>b</sup>       | 120 ±18 <sup>b</sup>    | 105 ±12 <sup>b</sup>    | 175 ±20 <sup>a</sup>    | 99±10 <sup>b</sup>      | *       | * | *   |
|                                  | methyl salicylate                  | 20 ±0 <sup>a</sup>       | 23 ±2 <sup>a</sup>      | 23 ±3 <sup>a</sup>      | 26 ±2 <sup>a</sup>      | 24±1 <sup>a</sup>       |         |   |     |
|                                  | isoamyl n-decanoate                | 91 ±3 <sup>c</sup>       | 148 ±18 <sup>a</sup>    | 127 ±6 <sup>ab</sup>    | 153 ±4 <sup>a</sup>     | 105±13 <sup>bc</sup>    |         | * |     |
|                                  | Sum                                | 668 ±16 <sup>a</sup>     | 545 ±29 <sup>b</sup>    | 531 ±26 <sup>b</sup>    | 706 ±15 <sup>a</sup>    | 643±18 <sup>a</sup>     | *       | * |     |
| Ethyl esters                     |                                    |                          |                         |                         |                         |                         |         |   |     |
|                                  | ethyl butyrate                     | 338 ±12 <sup>a</sup>     | 260 ±16 <sup>b</sup>    | 239 ±4 <sup>b</sup>     | 326 ±2 <sup>a</sup>     | 337±15 <sup>a</sup>     | *       |   | *   |
|                                  | ethyl 2-methylbutyrate             | 19 ±2 <sup>b</sup>       | 35 ±3 <sup>a</sup>      | 31 ±3 <sup>a</sup>      | 36 ±3 <sup>a</sup>      | 28±2 <sup>a</sup>       |         | * |     |
|                                  | ethyl isovalerate                  | 27 ±4 <sup>c</sup>       | 67 ±3 <sup>b</sup>      | 67 ±2 <sup>b</sup>      | 83 ±3 <sup>a</sup>      | 65±5 <sup>b</sup>       | *       | * | *   |
|                                  | ethyl hexanoate                    | 1860 ±30 <sup>c</sup>    | 2011 ±43 <sup>b</sup>   | 1903 ±46 <sup>c</sup>   | 2324 ±42 <sup>a</sup>   | 1944±35 <sup>bc</sup>   | *       | * | *   |
|                                  | ethyl heptanoate                   | 4 ±0 <sup>b</sup>        | 10 ±0 <sup>a</sup>      | 10 ±1 <sup>a</sup>      | 9±0 <sup>a</sup>        | 7±0 <sup>b</sup>        | *       | * | *   |
|                                  | ethyl lactate                      | 360 ±17 <sup>b</sup>     | 215 ±20 <sup>c</sup>    | 214 ±27 <sup>c</sup>    | 543 ±50 <sup>a</sup>    | 313±15 <sup>b</sup>     | *       | * | *   |
|                                  | ethyl 2-hexenoate                  | 28 ±1 <sup>a</sup>       | 25 ±1 <sup>ab</sup>     | 23 ±2 <sup>b</sup>      | 26 ±4 <sup>ab</sup>     | 28±1 <sup>ab</sup>      | *       |   |     |
|                                  | ethyl 2-hydroxyisovalerate         | 26 ±0 <sup>a</sup>       | 25 ±3 <sup>a</sup>      | 20 ±5 <sup>a</sup>      | 27 ±4 <sup>a</sup>      | 29±2 <sup>a</sup>       |         |   |     |
|                                  | ethyl octanoate                    | 462 ±1 <sup>d</sup>      | 558 ±18 <sup>b</sup>    | 545 ±12 <sup>bc</sup>   | 687 ±6 <sup>a</sup>     | 510±2 <sup>c</sup>      | *       | * | *   |
|                                  | ethyl nonanoate                    | 10 ±1 <sup>d</sup>       | 29 ±6 <sup>b</sup>      | 27 ±3 <sup>bc</sup>     | 58 ±1 <sup>a</sup>      | 16±0 <sup>cd</sup>      | *       | * | *   |
|                                  | ethyl 2-hydroxy-4-methylpentanoate | 317 ±15 <sup>a</sup>     | 195 ±4 <sup>c</sup>     | 196 ±2 <sup>c</sup>     | 249 ±3 <sup>b</sup>     | 301±7 <sup>a</sup>      | *       | * | *   |
|                                  | ethyl furoate                      | 7 ±0 <sup>c</sup>        | 11 ±0 <sup>b</sup>      | 12 ±1 <sup>a</sup>      | 8 ±0 <sup>c</sup>       | 9±0 <sup>c</sup>        | *       | * |     |
|                                  | ethyl decanoate                    | 4798 ±28 <sup>b</sup>    | 5880 ±757 <sup>b</sup>  | 5356 ±427 <sup>b</sup>  | 8666 ±193 <sup>a</sup>  | 4746±57 <sup>b</sup>    | *       | * | *   |
|                                  | diethyl succinate                  | 4467 ±145 <sup>a</sup>   | 3785 ±261 <sup>b</sup>  | 3918 ±84 <sup>ab</sup>  | 3776 ±32 <sup>b</sup>   | 4508±392 <sup>a</sup>   |         | * |     |
|                                  | ethyl 9-decenoate                  | 27 ±0 <sup>b</sup>       | 29 ±3 <sup>b</sup>      | 29 ±2 <sup>b</sup>      | 39 ±3 <sup>a</sup>      | 27±1 <sup>b</sup>       | *       | * | *   |
| succinic acid, butyl ethyl ester | 111 ±2 <sup>a</sup>                | 103 ±6 <sup>a</sup>      | 101 ±6 <sup>a</sup>     | 111 ±5 <sup>a</sup>     | 104±4 <sup>a</sup>      |                         |         |   |     |
| ethyl dodecanoate                | 1587 ±26 <sup>c</sup>              | 2211 ±266 <sup>b</sup>   | 1932 ±193 <sup>bc</sup> | 3014 ±89 <sup>a</sup>   | 1763±58 <sup>bc</sup>   | *                       | *       | * |     |

| Chemical class        | Compound                               |                        |                         |                         |                        |                        | Effects |   |     |
|-----------------------|----------------------------------------|------------------------|-------------------------|-------------------------|------------------------|------------------------|---------|---|-----|
|                       |                                        | C (t <sub>0</sub> )    | H36                     | H24                     | L36                    | L24                    | T       | S | TxS |
|                       | ethyl isopentyl succinate              | 302 ±15 <sup>a</sup>   | 240 ±10 <sup>b</sup>    | 245 ±16 <sup>b</sup>    | 247 ±15 <sup>b</sup>   | 273±10 <sup>ab</sup>   | *       |   |     |
|                       | ethyl tetradecanoate                   | 52 ±4 <sup>b</sup>     | 81 ±9 <sup>a</sup>      | 64 ±2 <sup>ab</sup>     | 64 ±10 <sup>ab</sup>   | 45±2 <sup>b</sup>      | *       | * |     |
|                       | ethyl hexadecanoate                    | 18 ±4 <sup>b</sup>     | 49 ±4 <sup>a</sup>      | 53 ±3 <sup>a</sup>      | 18 ±4 <sup>b</sup>     | 26±0 <sup>b</sup>      | *       | * |     |
|                       | phenylethyl octanoate                  | 14 ±1 <sup>c</sup>     | 28 ±2 <sup>b</sup>      | 38 ±4 <sup>a</sup>      | 23 ±2 <sup>bc</sup>    | 21±2 <sup>bc</sup>     | *       |   | *   |
|                       | 9,12-Octadecadienoic acid, ethyl ester | 26 ±2 <sup>bc</sup>    | 68 ±8 <sup>a</sup>      | 63 ±2 <sup>a</sup>      | 18 ±7 <sup>c</sup>     | 38±4 <sup>b</sup>      | *       |   | *   |
|                       | ethyl 9,12,15-octadecatrienoate        | 28 ±3 <sup>ab</sup>    | 48 ±7 <sup>a</sup>      | 47 ±8 <sup>a</sup>      | 21 ±10 <sup>b</sup>    | 25±1 <sup>b</sup>      | *       |   |     |
|                       | Sum                                    | 14889 ±59 <sup>b</sup> | 15963 ±830 <sup>b</sup> | 15133 ±608 <sup>b</sup> | 20371 ±97 <sup>a</sup> | 15163±510 <sup>b</sup> | *       | * | *   |
|                       | <b>Ketones</b>                         |                        |                         |                         |                        |                        |         |   |     |
|                       | 2-heptanone                            | 14 ±2 <sup>ab</sup>    | 9 ±2 <sup>c</sup>       | 9 ±1 <sup>c</sup>       | 16±1 <sup>a</sup>      | 11±0 <sup>bc</sup>     | *       | * | *   |
|                       | 2-nonanone                             | 2 ±0 <sup>b</sup>      | 3 ±0 <sup>a</sup>       | 3 ±0 <sup>b</sup>       | 3 ±0 <sup>ab</sup>     | 3±0 <sup>ab</sup>      |         |   |     |
|                       | Sum                                    | 17 ±2 <sup>ab</sup>    | 12 ±1 <sup>c</sup>      | 11 ±1 <sup>c</sup>      | 19 ±1 <sup>a</sup>     | 13±0 <sup>bc</sup>     | *       | * | *   |
| <b>Norisoprenoids</b> |                                        |                        |                         |                         |                        |                        |         |   |     |
|                       | vitispirane                            | 64 ±7 <sup>ab</sup>    | 69 ±2 <sup>a</sup>      | 66 ±4 <sup>a</sup>      | 73 ±1 <sup>a</sup>     | 55±1 <sup>b</sup>      |         | * | *   |
|                       | β-damascenone                          | 60±3 <sup>c</sup>      | 72 ±1 <sup>b</sup>      | 81 ±2 <sup>a</sup>      | 79 ±5 <sup>ab</sup>    | 75±3 <sup>ab</sup>     |         |   | *   |
|                       | Sum                                    | 124 ±3 <sup>c</sup>    | 141 ±3 <sup>ab</sup>    | 147 ±6 <sup>a</sup>     | 152 ±6 <sup>a</sup>    | 130±1 <sup>bc</sup>    |         | * | *   |
| <b>Terpenes</b>       |                                        |                        |                         |                         |                        |                        |         |   |     |
|                       | isocineole                             | 2 ±0 <sup>b</sup>      | 3 ±0 <sup>a</sup>       | 3 ±0 <sup>ab</sup>      | 3 ±0 <sup>a</sup>      | 3±0 <sup>ab</sup>      |         | * |     |
|                       | linalool oxide                         | 10 ±0 <sup>a</sup>     | 7 ±0 <sup>c</sup>       | 7 ±0 <sup>c</sup>       | 9 ±1 <sup>b</sup>      | 10±0 <sup>ab</sup>     | *       | * | *   |
|                       | L-linalool                             | 228 ±8 <sup>a</sup>    | 191 ±4 <sup>b</sup>     | 186 ±6 <sup>bc</sup>    | 173 ±6 <sup>c</sup>    | 200±0 <sup>b</sup>     |         | * | *   |
|                       | 1-terpinenol                           | 23 ±1 <sup>a</sup>     | 18 ±1 <sup>b</sup>      | 15 ±2 <sup>b</sup>      | 17 ±1 <sup>b</sup>     | 27±1 <sup>a</sup>      | *       | * | *   |
|                       | terpinen-4-ol                          | 31 ±0 <sup>a</sup>     | 26 ±2 <sup>ab</sup>     | 25 ±3 <sup>b</sup>      | 31 ±1 <sup>a</sup>     | 28±0 <sup>ab</sup>     | *       | * |     |
|                       | hotrienol                              | 9 ±1 <sup>a</sup>      | 1 ±0 <sup>b</sup>       | 1 ±0 <sup>b</sup>       | 1 ±0 <sup>b</sup>      | 2±0 <sup>b</sup>       | *       | * | *   |
|                       | myrcenol                               | 7 ±0 <sup>a</sup>      | 4 ±0 <sup>c</sup>       | 4±0 <sup>c</sup>        | 5 ±0 <sup>b</sup>      | 5±0 <sup>b</sup>       | *       |   |     |
|                       | α-terpineol                            | 483 ±19 <sup>ab</sup>  | 466 ±23 <sup>ab</sup>   | 486 ±26 <sup>a</sup>    | 414 ±11 <sup>b</sup>   | 506±2 <sup>a</sup>     |         | * | *   |
|                       | β-citronellol                          | 36 ±1 <sup>a</sup>     | 29 ±8 <sup>a</sup>      | 30 ±2 <sup>a</sup>      | 40 ±2 <sup>a</sup>     | 32±1 <sup>a</sup>      |         |   |     |
|                       | nerolidol                              | 247 ±21 <sup>a</sup>   | 229 ±12 <sup>ab</sup>   | 237 ±14 <sup>a</sup>    | 197 ±12 <sup>b</sup>   | 237±2 <sup>a</sup>     | *       | * |     |
|                       | 2,3-dihydrofarnesol                    | 48 ±4 <sup>a</sup>     | 53 ±3 <sup>a</sup>      | 59 ±8 <sup>a</sup>      | 44 ±0 <sup>a</sup>     | 49±2 <sup>a</sup>      | *       |   |     |
|                       | farnesol                               | 8 ±0 <sup>a</sup>      | 8 ±1 <sup>a</sup>       | 10 ±1 <sup>a</sup>      | 8 ±1 <sup>a</sup>      | 8±1 <sup>a</sup>       |         |   |     |
|                       | Sum                                    | 1149 ±45 <sup>a</sup>  | 1055 ±24 <sup>ab</sup>  | 1080 ±60 <sup>ab</sup>  | 965 ±9 <sup>b</sup>    | 1106 ±5 <sup>a</sup>   |         | * | *   |

Within each row significant differences at  $p < 0.05$  are indicated with different letters.
